# Supplementary material for: Methanomethylophilus alvi gen. nov., sp. nov., a Novel Hydrogenotrophic Methyl-Reducing Methanogenic Archaea of the Order Methanomassiliicoccales Isolated from the Human Gut and Proposal of the Novel Family Methanomethylophilaceae fam. nov
Source: MDPI journal article supplement (doi:10.3390/microorganisms11112794), 2023-11-17
Supplement: s1 [file s1]

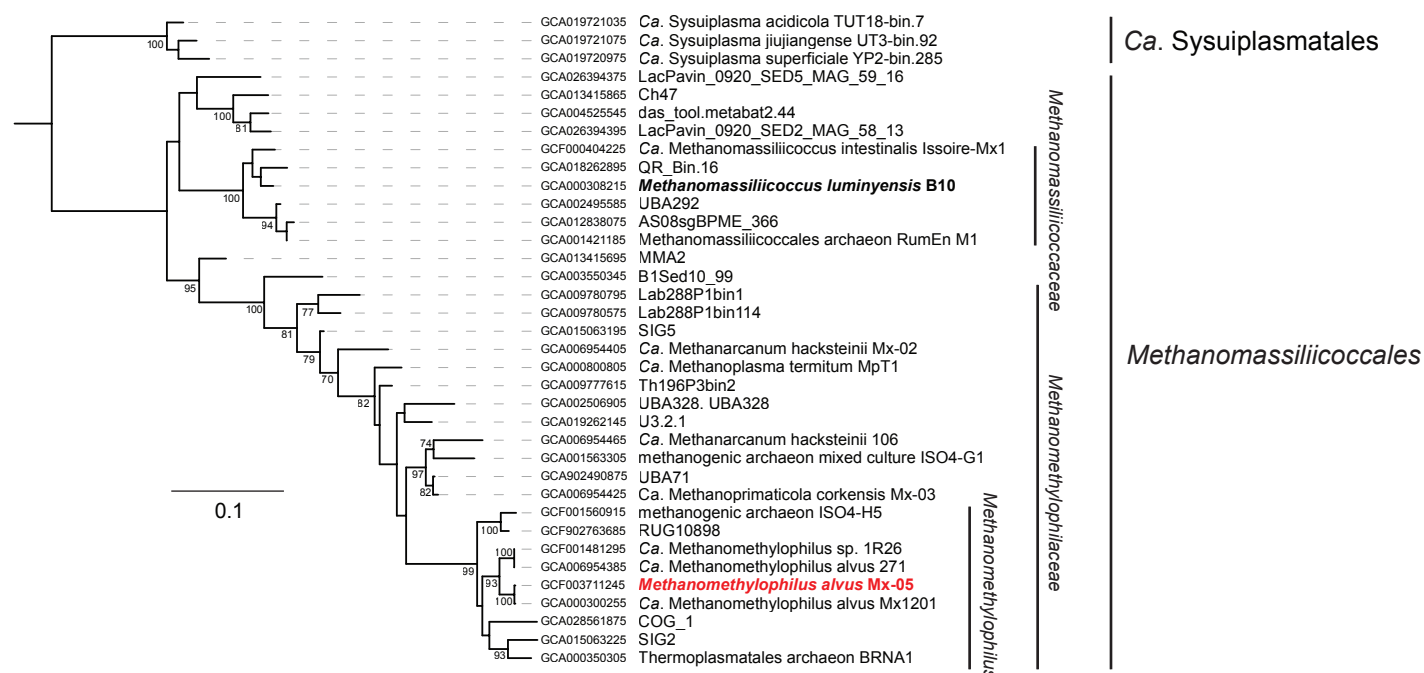

**Figure S1:** Position of Mx-05T in the 16S rRNA gene phylogeny of the Methanomassiliicoccales. Maximum likelihood tree built with GTR+F+R4 model. The tree is rooted on 'Candidatus Sysuiplasmatales' [38], with 1550 positions after trimming. Values on the tree indicate bootstrap support > 70%.
